# Supplementary material
Source: PubMed Central journal article supplement (PMC6532636)
Supplement: NIHMS1028952-supplement-Supplemental_Material.pdf [file NIHMS1028952-supplement-Supplemental_Material.pdf]

## Appendix 1: Syntax Utilized for Literature Search

| <b>Question/Topic 1: What microbiotas are not transferred to children who are born by C-section?</b>                                                                                                                                                                                                                                                                                                                                                                                                                                                                                                                                                                                                                                                                                                                                                                                                                                                                                                                                                                                                                                                                                                                           |                |
|--------------------------------------------------------------------------------------------------------------------------------------------------------------------------------------------------------------------------------------------------------------------------------------------------------------------------------------------------------------------------------------------------------------------------------------------------------------------------------------------------------------------------------------------------------------------------------------------------------------------------------------------------------------------------------------------------------------------------------------------------------------------------------------------------------------------------------------------------------------------------------------------------------------------------------------------------------------------------------------------------------------------------------------------------------------------------------------------------------------------------------------------------------------------------------------------------------------------------------|----------------|
| <b>PubMed Search Strategy 1</b>                                                                                                                                                                                                                                                                                                                                                                                                                                                                                                                                                                                                                                                                                                                                                                                                                                                                                                                                                                                                                                                                                                                                                                                                | <b>Results</b> |
| <p>(((((Cesarean Section[MeSH Major Topic]) OR ("Cesarean Section"[Title/Abstract] OR "Cesarean Sections"[Title/Abstract] OR c-section*[Title/Abstract]))) AND ((microbiota[MeSH Terms]) OR ((microbiota*[Title/Abstract] OR microbiome[Title/Abstract] OR microbial[Title/Abstract] OR microbe*[Title/Abstract] OR bacteria[Title/Abstract] OR microflora[Title/Abstract] OR bacteroides[Title/Abstract]))) AND ((((((child*[Title/Abstract]) OR infant*[Title/Abstract]) OR "Infant, Newborn"[Mesh]) OR ((neonate*[Title/Abstract] OR baby[Title/Abstract] OR babies[Title/Abstract])))</p>                                                                                                                                                                                                                                                                                                                                                                                                                                                                                                                                                                                                                                  | 70             |
| <b>PubMed Search Strategy 2</b>                                                                                                                                                                                                                                                                                                                                                                                                                                                                                                                                                                                                                                                                                                                                                                                                                                                                                                                                                                                                                                                                                                                                                                                                | <b>Results</b> |
| <p>(((((("Delivery, Obstetric"[Mesh]) OR ((childbirth[Title/Abstract] OR "mode of delivery"[Title/Abstract] OR "method of delivery"[Title/Abstract] OR "methods of delivery"[Title/Abstract]))) AND ((microbiota[MeSH Terms]) OR ((microbiota*[Title/Abstract] OR microbiome[Title/Abstract] OR microbial[Title/Abstract] OR microbe*[Title/Abstract] OR bacteria[Title/Abstract] OR microflora[Title/Abstract] OR bacteroides[Title/Abstract]))) AND ((((((child*[Title/Abstract]) OR infant*[Title/Abstract]) OR "Infant, Newborn"[Mesh]) OR ((neonate*[Title/Abstract] OR baby[Title/Abstract] OR babies[Title/Abstract]))) NOT ((((((Cesarean Section[MeSH Major Topic]) OR ("Cesarean Section"[Title/Abstract] OR "Cesarean Sections"[Title/Abstract] OR c-section*[Title/Abstract]))) AND ((microbiota[MeSH Terms]) OR ((microbiota*[Title/Abstract] OR microbiome[Title/Abstract] OR microbial[Title/Abstract] OR microbe*[Title/Abstract] OR bacteria[Title/Abstract] OR microflora[Title/Abstract] OR bacteroides[Title/Abstract]))) AND ((((((child*[Title/Abstract]) OR infant*[Title/Abstract]) OR "Infant, Newborn"[Mesh]) OR ((neonate*[Title/Abstract] OR baby[Title/Abstract] OR babies[Title/Abstract])))</p> | 100            |

**Question/Topic 2: How are those specific microbiota connected to health (obesity, diabetes, allergies, asthma and other)? How long are those health consequences sustained?**

**PubMed Search Strategy 1**

**Results**

(((((microbiota[MeSH Terms]) OR ((microbiota\*[Title/Abstract] OR microbiome[Title/Abstract] OR microbial[Title/Abstract] OR microbe\*[Title/Abstract] OR bacteria[Title/Abstract] OR microflora[Title/Abstract] OR bacteroides[Title/Abstract]))) AND (("Delivery, Obstetric"[Mesh]) OR ((childbirth[Title/Abstract] OR "mode of delivery"[Title/Abstract] OR "method of delivery"[Title/Abstract] OR "methods of delivery"[Title/Abstract]))) AND (((("Patient Outcome Assessment"[Mesh:NoExp]) OR "Treatment Outcome"[Mesh])) AND ((child\*[Title/Abstract]) OR infant\*[Title/Abstract]))) OR (((((((Diabetes Mellitus[MeSH Terms]) OR diabet\*[Title/Abstract]) OR Hypersensitivity[MeSH Terms]) OR allerg\*[Title/Abstract]) OR asthma[MeSH Terms]) OR asthma\*[Title/Abstract]) OR Obesity[MeSH Terms]) OR obes\*[Title/Abstract]))

61

**Question/Topic 3: Have vaginal microbiota been successfully transferred to babies born by C-section? If not, in what other contexts has microbiota restoration been successful? What mechanisms are typically used? And what factors make for a successful restoration (e.g. timing of restoration, length of time the bacteria remain in place, etc.)?**

**PubMed Search Strategy 1**

**Results**

((((((restor\*[Title/Abstract] OR establish\*[Title/Abstract] OR transfer\*[Title/Abstract] OR rebuild\*[Title/Abstract] OR rebuilt[Title/Abstract]))) OR ((transplant\*[Title/Abstract] OR recoloniz\*[Title/Abstract]))) AND ((microbiota[MeSH Terms]) OR ((microbiota\*[Title/Abstract] OR microbiome[Title/Abstract] OR microbial[Title/Abstract] OR microbe\*[Title/Abstract] OR bacteria[Title/Abstract] OR microflora[Title/Abstract] OR bacteroides[Title/Abstract]))) AND (("Delivery, Obstetric"[Mesh]) OR ((childbirth[Title/Abstract] OR "mode of delivery"[Title/Abstract] OR "method of delivery"[Title/Abstract] OR "methods of delivery"[Title/Abstract])))

34

**[Additional search by different librarian]**

**PubMed Strategy 1**

**Results**

infant OR infants OR newborn\* OR neonat\*

45

Immunologic Adjuvants OR Immunotherapy OR Immunomodulation OR Immunization OR Microbiota OR Probiotics OR probiotic\* OR Prebiotics OR prebiotic\* OR Lactobacillus OR bacteroidetes OR bacteria OR Bifidobacterium OR commensal OR Dysbiosis [mh] OR dysbios\* [tiab] OR disbios\* [tiab] OR dys-symbios\* [tiab] OR dysbacterios\* [tiab] OR disbacterios\* [tiab]

Therapy OR therapeutic use OR ad [sh] OR Dietary Supplements
